# Supplementary material for: Assessing the Acceptability and Usability of an Interactive Serious Game in Aiding Treatment Decisions for Patients with Localized Prostate Cancer
Source: PubMed Central journal article supplement (PMC3221354; doi:10.2196/jmir.1519), 2011-01-12
Supplement: jmir_v13i1e4_app1.pdf [file jmir_v13i1e4_app1.pdf]

## Multimedia Appendix 1: Survey Instrument

Please rank the following statements according to what you agree with. There are no right or wrong answers. Please circle the number corresponding to how you feel about a statement.

|                                                                                                                     | <b><u>Strongly Agree</u></b> |   |   |   |   |   | <b><u>Strongly Disagree</u></b> |
|---------------------------------------------------------------------------------------------------------------------|------------------------------|---|---|---|---|---|---------------------------------|
| 1. If it had been available at the time of my diagnosis, the interactive website would have improved my confidence. | 1                            | 2 | 3 | 4 | 5 | 6 | 7                               |
| 2. The interactive website is useful.                                                                               | 1                            | 2 | 3 | 4 | 5 | 6 | 7                               |
| 3. At the time of my diagnosis, the game would have increased my knowledge.                                         | 1                            | 2 | 3 | 4 | 5 | 6 | 7                               |
| 4. An interactive website is effective for providing information.                                                   | 1                            | 2 | 3 | 4 | 5 | 6 | 7                               |
| 5. The instructions are sufficient.                                                                                 | 1                            | 2 | 3 | 4 | 5 | 6 | 7                               |
| 6. The <i>tone</i> of the interactive website is appropriate.                                                       | 1                            | 2 | 3 | 4 | 5 | 6 | 7                               |
| 7. While using the interactive website, it is clear which treatment is being explored.                              | 1                            | 2 | 3 | 4 | 5 | 6 | 7                               |
| 8. While using the interactive website, it is clear which time period is being explored.                            | 1                            | 2 | 3 | 4 | 5 | 6 | 7                               |

Reichlin L. et al.: Assessing the Effectiveness of an Interactive Serious Game in Aiding Treatment Decisions for Patients with Localized Prostate Cancer

|                                                                                                                                                      |   |   |   |   |   |   |   |
|------------------------------------------------------------------------------------------------------------------------------------------------------|---|---|---|---|---|---|---|
| 9. While using the interactive website, the screen on Handout 1 is useful.                                                                           | 1 | 2 | 3 | 4 | 5 | 6 | 7 |
| 10. While using the interactive website, the screen on Handout 2 is useful.                                                                          | 1 | 2 | 3 | 4 | 5 | 6 | 7 |
| 11. The screen on Handout 3 is useful.                                                                                                               | 1 | 2 | 3 | 4 | 5 | 6 | 7 |
| 12. If it had been available at the time of my diagnosis, Handout 3 screen would have affected my final decision.                                    | 1 | 2 | 3 | 4 | 5 | 6 | 7 |
| 13. The screen on Handout 4 is useful.                                                                                                               | 1 | 2 | 3 | 4 | 5 | 6 | 7 |
| 14. The screen on Handout 5 is useful.                                                                                                               | 1 | 2 | 3 | 4 | 5 | 6 | 7 |
| 15. The screen on Handout 6 is useful.                                                                                                               | 1 | 2 | 3 | 4 | 5 | 6 | 7 |
| 16. Using the interactive website would help me discuss treatment options with my doctor.                                                            | 1 | 2 | 3 | 4 | 5 | 6 | 7 |
| 17. If it had been available at the time of my diagnosis, I would have felt comfortable using this interactive website to aid in my decision-making. | 1 | 2 | 3 | 4 | 5 | 6 | 7 |
| 18. I would recommend this interactive website to a friend who has just been diagnosed with prostate cancer.                                         | 1 | 2 | 3 | 4 | 5 | 6 | 7 |
