# Supplementary material for: Assessing the Acceptability and Usability of an Interactive Serious Game in Aiding Treatment Decisions for Patients with Localized Prostate Cancer
Source: PubMed Central journal article supplement (PMC3221354; doi:10.2196/jmir.1519), 2011-01-12
Supplement: jmir_v13i1e4_app2.pdf [file jmir_v13i1e4_app2.pdf]

## Multimedia Appendix 2

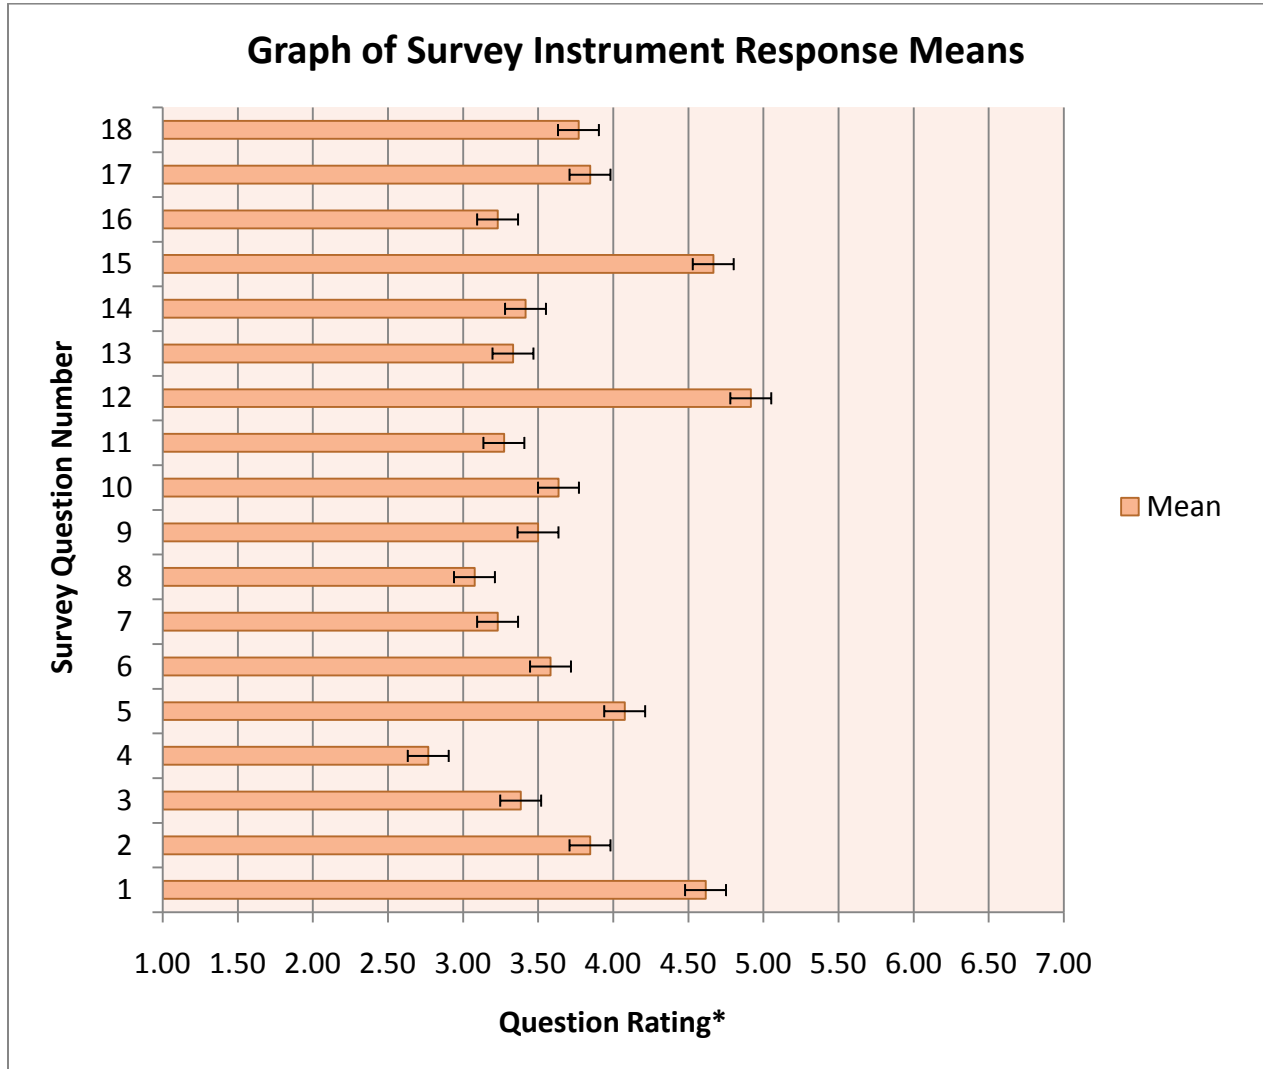

\*Participants rated questions on a Likert scale of 1 – 7, with a rating of 1 corresponding with “Strongly Agree” and a rating of 7 corresponding with “Strongly Disagree.”
